# Supplementary material for: Propyrisulfuron plus cyhalofop butyl as one-shot herbicides provide high weed control efficiency and net economic performance in mechanically transplanted rice
Source: Frontiers journal article supplement (doi:10.3389/fpls.2023.1281931), 2023-10-18
Supplement: Table_1.docx [file Table_1.docx]

Supplemental Table1. Analysis-of-variance (F-values) for rice grain yield, rice height, weed density and weed biomass between years and treatments

| Source of variation | df | Rice grain Yield | Rice height | Weed density | Weed biomass |
| --- | --- | --- | --- | --- | --- |
| Year(Y) | 1 | 1.24ns | 1.04ns | 1.88ns | 2.48ns |
| Treatment (T) | 9 | 609.79** | 2.01ns | 1274.21** | 1010.58** |
| Y×T | 9 | 0.8ns | 1.27ns | 1.26ns | 1.66ns |

** represents significance at the *P* = 0.05 and *P* = 0.01 level, respectively, and ns denotes non-significance (*P* > 0.05). The experiment was in a complete randomized block design with four replicates.
